# Supplementary material for: Systems and Evolutionary Characterization of MicroRNAs and Their Underlying Regulatory Networks in Soybean Cotyledons
Source: PubMed Central journal article supplement (PMC3903507; doi:10.1371/journal.pone.0086153), 2014-01-27

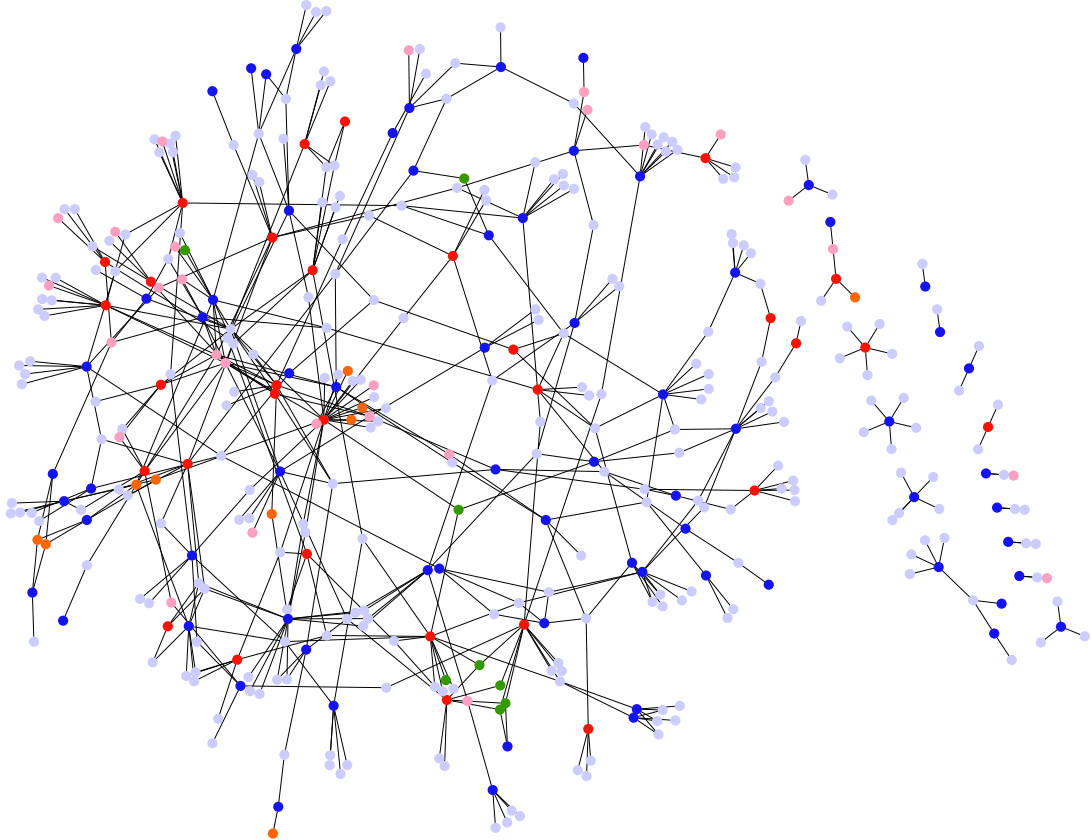

Supplement: pone.0086153.s004.pdf [file pone.0086153.s004.pdf]
